# Supplementary material for: Theranostic body fluid cleansing: rationally designed magnetic particles enable capturing and detection of bacterial pathogens
Source: Royal Society of Chemistry journal article supplement (doi:10.1039/c6tb01272h), 2016-01-01
Supplement: c6tb01272h1.pdf [file c6tb01272h1.pdf]

## ***ELECTRONIC SUPPORTING INFORMATION***

### **Theranostic Body Fluid Cleansing: Rationally designed Magnetic Particles enable Capturing and Detection of Bacterial Pathogens**

*M. Lattuada, Q. Ren, F. Zuber, M. Galli, N. Bohmer, M.T. Matter, A. Wichser, S. Bertazzo, G.B. Pier and I.K. Herrmann\**

*\*Department Materials Meet Life,*

*Swiss Federal Laboratories for Materials Science and Technology (Empa),*

*Lerchenfeldstrasse 5,*

*9014 St. Gallen, Switzerland.*

*email: [inge.herrmann@empa.ch](mailto:inge.herrmann@empa.ch); phone: +41 58 765 71 53*

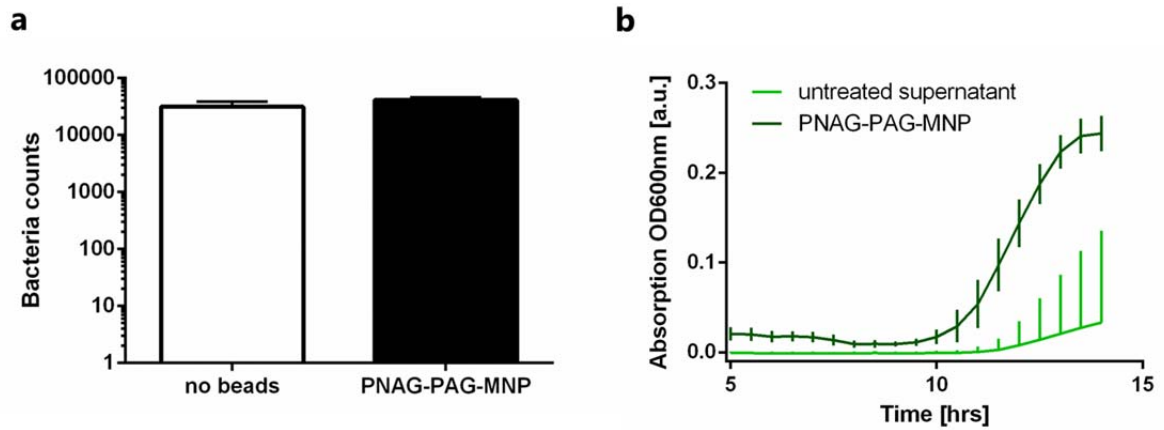

**Figure S1:** Bacteria samples incubated with PNAG-PAG-MNP show normal growth rate compared to controls (no beads)(**a**). Measurements of re-growth of *S. aureus* in the untreated supernatant (no beads) and on collected beads show enrichment of bacteria on the beads (**b**).

**Bacteria viability quantification with proliferation test (Re-growth).** 100  $\mu$ l of the resuspended beads was mixed with 900  $\mu$ l fresh 30 % TSB (9 g/l) containing 0.25% glucose. 200  $\mu$ l of the mixture was added to a microplate well (3 repeats) and the plate was closed with a sticking transparent foil (Diversified Biotech - Breathe-Easy, T093.1, Carl Roth GmbH+Co. KG) and incubated in a Synergy HT Multi-Detection Microplate Reader (BioTek®) at 37 °C and medium shaking (18Hz - preset value of the instrument). Optical density at 600 nm was measured every 30 min for 14 hours. For each sample, two independent experiments were performed.
